# Endosymbiont diversity and evolution across weevil tree of life

Guanyang Zhang<sup>1#</sup>, Patrick Browne<sup>1,2#</sup>, Geng Zhen<sup>1#</sup>, Andrew Johnston<sup>4</sup>, Hinsby Cadillo-Quiroz<sup>5</sup>, and Nico Franz<sup>1</sup>

<sup>1</sup> School of Life Sciences, Arizona State University, Tempe, Arizona, USA

<sup>2</sup> Department of Environmental Science, Aarhus University, 4000 Roskilde, Denmark

# These authors contributed equally to this work

## ABSTRACT

As early as the time of Paul Buchner, a pioneer of endosymbionts research, it was shown that weevils host diverse bacterial endosymbionts, probably only second to the hemipteran insects. To date, there is no taxonomically broad survey of endosymbionts in weevils, which preclude any systematic understanding of the diversity and evolution of endosymbionts in this large group of insects, which comprise nearly 7% of described diversity of all insects. We gathered the largest known taxonomic sample of weevils representing four families and 17 subfamilies to perform a study of weevil endosymbionts. We found that the diversity of endosymbionts is exceedingly high, with as many as 44 distinct kinds of endosymbionts detected. We recovered an ancient origin of association of *Nardonella* with weevils, dating back to 124 MYA. We found repeated losses of this endosymbionts, but also cophylogeny with weevils. We also investigated patterns of coexistence and coexclusion.

## INTRODUCTION

Weevils (Insecta: Coleoptera: Curculionoidea) host diverse bacterial endosymbionts. In his monumental book, “Endosymbiosis of Animals with Plant Microorganisms”, Buchner (1965) (p. 160) remarked that “nowhere else aside from the cicadas [Hemiptera: Auchenorrhyncha and Sternorrhyncha] do so many symbiotic sites exist as in this insect family [Curculionidae sensu lato]”. (citation not found: Nardon&Grenier) (p. 181) listed nine morphological types of endocytobiosis (a.k.a, bacterial endosymbiosis) in Curculionidae (excluding Scolytinae, therein as Scolytidae). They lamented on the ubiquity of bacterial endosymbionts in weevils and suggested that “most if not all Curculionids harbor endocytobiotic bacteria” (p. 189). Despite this long-standing realization, the diversity, evolution and biology of bacterial symbionts of weevils have been poorly documented or understood, especially if compared to Auchenorrhyncha and Sternorrhyncha (“Homoptera”). With 62,000 described species and 220,000 estimated to exist (Oberprieler 2007), weevils are a mega-diverse group of insects and represent a premier system for studying bacterial symbionts.

The astounding diversity of weevils strongly contrasts with the rather small number of species that have been studied for bacterial symbionts. Early research using morphological techniques examined only some 30 genera of weevils (Buchner 1965), and these typically did not reveal the taxonomic identities of the symbionts. The first molecularly characterized endosymbiont from weevils was SOPE, or “*Sitophilus oryzae* Primary Endosymbiont”. This was later named as “*Candidatus Sodalis pierantonius*” (the

qualifier *Candidatus*, indicating that the species name is provisional [Murray 1995], is only used at the first occurrence of a name and will be omitted from subsequent occurrences). *Sodalis* was previously placed in Enterobacteriaceae, which has been split into several families (Adeolu 2016), resulting in its new placement in Pectobacteriaceae of the order Enterobacteriales, in the class Gammaproteobacteria. *Sodalis* was first described from tsetse flies (Glossinidae, Diptera) (Dale 1999) and has also been found infecting various insects including Aphididae, Cercopidae, Cicadellidae, Pentatomidae, Scutelleridae, (mostly plant sucking insects; Hemiptera), Apidae, Megachilidae (bees; Hymenoptera), Philopteridae (lice; Phthiraptera), and Cerambycidae (longhorn beetles; Coleoptera). Lefevre (2004) described “*Candidatus Nardonella*” (Enterobacteriaceae) from a group of dryophthorine weevils (Dryophthorinae/-idae). Subsequent studies found *Nardonella* from the weevil subfamilies Brachycerinae/-idae (Erihrininae/-idae), Cyclominae, Entiminae and Molytinae (Hosokawa 2010, Hosokawa 2015, Huang 2016, Hirsch 2012, Merville 2013, Conord 2008, White 2015). To date *Nardonella* has not been found from other insects and its association with weevils is unique among insects. In a series of studies, Toju et al. (2009); Toju et al. (2013); Toju et al. (2010) discovered and documented “*Candidatus Curculioniphilus*” (Enterobacteriaceae) from several genera within the Curculioninae, namely, *Curculio*, *Shigizo*, *Archarius*, *Koreoculio* and *Carponinus*. *Curculioniphilus* is also a weevil-specific bacterial lineage. Besides *Sodalis*, *Nardonella* and *Curculioniphilus* other bacterial endosymbionts such as *Wolbachia*, *Rickettsia* (Alphaproteobacteria), *Spiroplasma* (Mollicutes), *Klebsiella pneumonia* (Gammaproteobacteria) have been previously found from weevils. Additionally, several weevils of (*Trigonotarsus* and *Diocarandra*) are associated with several distinct and unnamed endosymbionts. Here we provide a succinct summary of the published findings.

Previous studies on weevil endosymbionts were limited in the taxonomic scope of weevils. The phylogenetic space or the tree of life of weevils thus remains poorly sampled. This study represents the first attempt to gather a large taxonomic sample of weevils that represents a comprehensive phylogenetic diversity, albeit sparsely, to investigate the diversity and evolution of their associated endosymbionts.

## MATERIAL AND METHODS

### *Insect taxonomic sampling and specimen vouchering*

We performed DNA extractions and PCR amplifications on a total of 244 beetle specimens, which represented five superfamilies (Chrysomeloidea: Cerambycidae, Chrysomelidae, Disteniidae; Cleroidea: Cleridae, Melyridae, Trogossitidae; Cucujoidea: Coccinellidae, Erotylidae; Curculionoidea: Anthribidae, Attelabidae, Brentidae, Curculionidae, Erihrinidae; Tenebrinoidea: Tenebrionidae). Within the Curculionoidea, four families – Anthribidae, Attelabidae, Brentidae, and Erihrinidae – were studied for the first time for their bacterial symbionts using a molecular method. Within the family Curculionidae, 17 subfamilies were sampled, 13 for the first time.

We assigned a morpho-species code starting with “BEP” (Bacterial Endosymbionts Project) to each species (e.g., BEP 123). For each morpho-species, the specimen used for DNA extraction, whether dissected or intact, was designated as the primary voucher, and additional conspecific specimens, if available, were designated as secondary vouchers. All voucher specimens were deposited at the Arizona State University Hasbrouck Insect Collection (ASUHC) and databased using the SCAN (Symbiota

Collections of Arthropods Network) database (Gries et al., 2014) and the specimen records are accessible online (<http://symbiota4.acis.ufl.edu/scan/portal/index.php>). Morpho-species code and voucher status were recorded in the 'notes' field (e.g., BEP 123, primary voucher). Of the 244 beetle specimens, 124 (51%) generated usable PCR products (see below), 115 of which were weevils and nine other beetles.

#### *DNA extraction and PCR amplification of bacterial 16s*

For species with two or more conspecific specimens, we dissected the abdomen and isolated the gut contents of one specimen, which was used for DNA extraction. For singleton species with only one specimen available, we used the entire specimen for DNA extraction, without gut dissection. Of the specimens that generated usable PCR products, 103 were subjected to gut dissection and 21 were extracted from whole bodies. The dissected gut contents were subjected to one minute of (twice of 30 seconds) bead beating with bead beater before used for DNA extraction. DNA extraction was performed with the Qiagen Blood and Tissue DNeasy Kit.

We performed two rounds of PCR amplifications. We first used regular primers that were not barcode-tagged (515F: 5'-GTGYCAGCMGCCGCGGT-3' and 909R: 5'-CCCCGYCAATTCMTTTRAGT-3'), to amplify a 400 bp (base pair) fragment of the gene 16s. Gel electrophoresis of the PCR products recovered bands consistently for the negative control, probably due to reagent contamination, although usually weaker than the bands of the actual samples. Samples that had bands stronger than the negative controls were then used for the second round of PCR amplification. The primers used in the second round of PCR amplification were barcode-tagged at the 5' end. Each barcode consists of six nucleotides and differs from one another by two nucleotide positions. Altogether 138 samples went through two rounds of PCR, of which 124 were successful in both rounds. The PCR products of those samples were subsequently sequenced and are here called usable PCR products.

#### *Post-PCR processing and sequencing - gel extraction, quantification, normalization, library preparation and Illumina sequencing*

Two PCR bands were obtained for most samples. This was unexpected and led us to investigate the specificity of the primers. It was determined that the primers align near perfectly with insect 18s sequences and define a region longer than the target bacterial 16s fragment. Therefore, we deemed that the smaller fragment represented the bacterial 16s gene. Gel extraction was performed with the Promega Wizard® SV Gel and PCR Clean-Up System to extract and purify bacterial 16s bands. The purified PCR products were Quantified with a NanoDrop spectrophotometer. Normalization was performed using the SequalPrep™ Normalization Plate Kit by Thermo Fisher Scientific. This created a pooled sample containing 124 PCR products. This was further subjected to Illumina library preparation performed by the "DNASU Next Generation Sequencing Laboratory" (<http://dnasusequencing.org/>). Paired-end sequencing was performed on a single Illumina MiSeq lane.

#### *Read processing – demultiplexing, quality filtering, and chimera removal*

A python script was used to demultiplex paired reads, trim barcode and primer sequences and to perform quality control. The script required exact matches to both barcodes and for each of the forward and reverse primer sequences to be present with a maximum of three mismatches to the degenerate primer sequences in order for paired reads to be binned into a sample. The quality trimming removed the barcode

and primer sequences and trimmed the 3' end of the reads from the first point where a Phred score of less than 2 was encountered. If, after trimming, either of a pair of reads was shorter than 200 nt, the read pair was discarded.

After demultiplexing, read pairs were assembled using the program PEAR (Zhang et al., 2014). Following read assembly, reads were quality filtered using the 'maxee' parameter of usearch (Edgar, 2010) to remove any reads with more than one expected error. We obtained a dataset of 11,396,976 sequences. The assembled reads were dereplicated and singletons were removed from the dataset using VSEARCH (Rognes et al., 2016) (<https://github.com/torognes/vsearch>). Reference based and de novo chimera detection was performed using vsearch's "uchime\_ref" and "uchime\_denovo" functions respectively on sequences within each sample. It would be computationally prohibitive to perform chimera detection on the pooled dataset. The abskew parameter was set to 1.5 for the de novo chimera detection and a customized version of the May 2013 version of the greengenes 16s database, modified to include known endosymbiont lineages, was used for reference based chimera detection (see "supplementary method description" in Supporting Information). Sequences flagged as chimeric by either method, de novo or reference based, were discarded. The quality-filtered, dereplicated, chimera-removed dataset contained 282,587 sequence reads.

#### *Phylogenetic identification of endosymbiont sequences*

We devised a method termed "phylogenetic identification of next generation sequences" (PINGS) to perform taxonomic assignments of 16s amplicon sequences. We resorted to this method because an initial analysis in QIIME using a distance-based taxonomic assignment method failed to place 45% of our sequence reads at the genus level or below. Moreover, weevil-specific endosymbionts such as *Nardonella* and *Curculioniphilus* were not recovered in that analysis. The PINGS method consists of five steps and a succinct description is provided here: sequencing filtering, scaffold phylogeny reconstruction, symbiont screening, phylogenetic verification, and taxonomic assignment. Sequence filtering entailed the use of USEARCH to filter the dereplicated, chimera-removed dataset to retain only sequences with 100 and more reads. This resulted in a dataset of 4,217 sequences and we call this the "100 plus" dataset. The next step, scaffold phylogeny reconstruction, we started with generating a genus-level reference 16s dataset by filtering the "custom greengenes 16s reference dataset" to retain only sequences with genus names (many sequences in the greengenes dataset do not have names at the genus level). This dataset (1,209 sequences) was combined with the 100 plus dataset and together they were aligned using MAFFT version 7 (Kato 2009, Kato 2013) to generate an alignment of 5426 sequences. A maximum likelihood phylogeny was reconstructed using RAxML (Stamatakis 2014) scaffold phylogeny. During the next step, symbiont screening, we inspected the scaffold phylogeny to screen for "provisional endosymbionts", using Dendroscope 3 (version 3.5.7) (Huson 2012). A sequence was considered as a "provisional endosymbiont" if it either clustered with reference endosymbionts or appeared to be highly divergent from its closest relatives and also was highly abundant (read number greater than 1000). During initial data exploration, we observed that different samples shared identical sequences, probably a result of mismatching barcodes (Sinclair et al., 2014), and also that the true sequence had the highest read number, often 10 times or greater than those of the false positives. We excluded these false positive sequences. Because the taxonomic sampling of symbionts and their closely related taxa in the reference 16s dataset was not comprehensive, the identities of the provisional endosymbiont sequences would need to be further tested, which constitutes the final step called phylogenetic verification. Here, the provisional endosymbiont

sequences were queried against Genbank using BLAST, and the sequences of top matches representing different species or genera were downloaded. These included both determined sequences (to genus or species) and undetermined sequences that were proposed to be insect symbionts in the study that report them. Besides, a taxonomically broad sample of related sequences (both symbionts and non-symbionts) were downloaded from Genbank. Finally, these sequences (BLAST matches and separate downloads) were aligned with the provisional endosymbiont sequences and maximum likelihood phylogenetic analyses was performed. In the last step, taxonomic assignment, we inspected each phylogeny and assigned taxonomy to the endosymbiont sequences. For each sequence we made a short statement regarding its phylogenetic relationship to reference bacteria, such as “part of Wolbachia clade” or “sister to Prevotellaceae”. Assignment to genus or species was achieved for most sequences, but not possible for some sequences and this is because they formed a sister relationship to a group of genera or appeared to be highly divergent from their closest relatives. Those were assigned to the next higher taxonomic rank (family or order).

#### *Tests for correlation or coexistence*

A Spearman’s rank correlation test was performed to test for direction and strength of correlation between pairs of major endosymbiont groups and the results were visualized using the R packages corrplot (Wei 2016) and Hmisc(Jr 2017). Chi-square tests, implemented in R statistical environment, were used to examine if the occurrences of endosymbionts were non-randomly distributed in i.e., Nardonella-free versus Nardonella-positive samples, or if Nardonella had an impact on the occurrences of other symbionts.

#### *Terms and definitions*

Reads are unprocessed Illumina sequences and are redundant. Abundance of a sequence is the number identical reads representing that sequence. A sample refers to the total collection of sequences derived from a single specimen. We use the term “kind of endosymbiont” as the basic taxonomic unit here. Most of the time this corresponds to a genus, e.g., *Spiroplasma*, but sometimes a group of inadequately determined endosymbiont sequences (e.g., Porphyromonadaceae symbiont of weevil; Table 1). An occurrence refers to the observation of one kind of endosymbiont in a sample. Co-existence is defined as the observation of two occurrences of endosymbionts in the same sample.

## **RESULTS & DISCUSSION**

#### *Sequence data profile*

The demultiplexed, unfiltered data set contained a total of 11,396,976 reads. The number of reads per sample ranged from 4,483 to 457,087 (mean = 91,911, median = 64,972, stdev = 86,430). The dereplicated, chimera-filtered data set contained 5,820,560 reads, which represented 282,587 unique sequences. The total number of reads per sample in this data set ranged from 845 to 289,425 (mean = 46,940, median = 29,290, stdev = 50,786; Fig. 1a).

#### *Bacterial endosymbionts—phylogenetic identity, abundance and genetic divergence*

We determined that 41.9% (2,436,371) of the dereplicated reads, representing 229 unique sequences, came from bacterial endosymbionts. Of the 124 samples sequenced, 109 (87.9%) were infected with at least one endosymbiont, 101 of which are weevils. For simplicity of presentation, we do not distinguish weevils and other insects when describing the results, unless it is otherwise stated. In a majority (61% or 76/124) of the samples, endosymbionts comprised greater than 40% of the reads in a sample (Fig. 1a). The non-symbiont reads also included those that were variants (generated from PCR or sequencing errors) of the most abundant endosymbiont sequences, so the actual proportion of endosymbionts in each sample would be somewhat higher than shown in Fig. 1a. All endosymbiont sequences comprised 199 occurrences (Fig. 1b). A total of 49 kinds of endosymbionts were identified based on the PINGS method, 46 of which were associated with weevils and 3 exclusively with non-weevil beetles (Table 1). These were placed in 27 families, 15 orders, 9 classes, and 4 phyla (Table 1). Composed of 28 kinds of endosymbionts, Proteobacteria showed the highest diversity among our sequences, followed by Bacteroidetes (11), Firmicutes (7) and Tenericutes (3). Thirty five (71%) kinds of endosymbionts were placed to a genus, but 14 (29%) could not be assigned to any genera and instead were placed at the family or order level (Table 1). These sequences diverged significantly from their closest relatives, and were 82.8-95.7% similar to their best BLAST matches. The most common five kinds of endosymbionts, in terms of the number of samples associated, are *Nardonella* (associated with 44 samples), *Wolbachia* (28), *Rickettsia* (12), *Spiroplasma* (9) and *Sodalis* (7).

We classified the 49 kinds of endosymbionts into 10 major groups as described in the following. Bacteroidetes, Tenericutes (represented by Mollicutes in this study) and Firmicutes constituted 3 groups as each is a different phylum. The remaining 7 groups all belong to the phylum Proteobacteria. First, these were separated by class, which resulted in recognizing Rickettsiales (the only order of the class Alphaproteobacteria recovered in this study) and Betaproteobacteria as 2 groups and Gammaproteobacteria containing the remaining 5 groups. *Nardonella* was considered as its own group as this is the most widely present endosymbiont and also one of the focal endosymbionts of our study. Enterobacteriales (treated as excluding *Nardonella* throughout the text), Pasteurellales & Orbales (P & O), Chromatiales and Vibrionales, four different order-level taxa, were treated as different groups. This grouping scheme allowed us to examine patterns of endosymbiont diversity, divergence and co-existence at a level that is reasonably granular yet cohesive. For each major group of endosymbionts, the number of occurrence is as follows: *Nardonella* (44), Rickettsiales (41), Enterobacteriales (31), Bacteroidetes (29), Firmicutes (18), P & O (17), Mollicutes (11), Betaproteobacteria (5), Chromatiales (2), and Vibrionales (1).

The abundance of the endosymbiont sequences ranged from 101 to 151,706 (median = 3,273, mean = 10,639, stdev = 19,027; Fig. 1c). About 30% (69/229) of the sequences exhibited relatively low abundance (100-1000), 44% medium to high abundance (1000-10,000), and 26% very high abundance (>10,000). *Nardonella* showed the highest median abundance (16,153), followed by Mollicutes and Firmicutes, and the Bacteroidetes the lowest (Fig. 1c). All but two groups (P & O and Vibrionales) contained at least one sequence with abundance greater than 10,000. The highest abundance (151,706) of any sequences was found in a *Spiroplasma* (Mollicutes) endosymbiont (Table 1, Fig. 1c).

Half of the sequences (115/229) shared less than 97% similarity to their respective best BLAST matches, and those were pertinent to 30 kinds or 61% of the endosymbionts (Table 1, Fig. 1d). The median similarity across all endosymbionts was 96.8% (Fig. 1d). All the sequences of *Nardonella*, P & O,

Chromatiales and Vibrionales showed less than 97% similarity to their best BLAST matches. The BLAST matches of 76% (174/229) sequences were congruent with the phylogenetic placements of the endosymbionts at the genus level (regardless of percentage similarity) (Table 1). The lowest similarity (80.9%) was found in a sequence of *Nardonella*. Interestingly, Only two kinds of endosymbionts, *Dysgonomonas* (Bacteroidetes) and *Gibbsiella* (Eneerobacteriales), contained sequences that showed similarity both above and below 97% to their best BLAST matches (Table 1).

#### *Nardonella—origin, repeated losses and co-evolution*

We recovered the weevil-specific endosymbiont *Nardonella* from Brentidae, more specifically, the subfamily Apioninae, for the first time (Fig. 2). Brentidae is the sister group of Curculionidae and together they are here referred to as the “BC clade”. We thus provide evidence to support that the origin of *Nardonella* association with weevils dates back to 124.5 MYA (million years ago), or the Early Cretaceous. *Nardonella* was not detected from Attelabidae (n=5) or Anthribidae (n=3; 1 sample not shown in Fig. tree as no symbionts were recovered), the other two weevil families examined. Within the Curculionidae, *Nardonella* was newly recovered from Baridinae, Ceutorhynchinae and Conoderinae, and from many genera previously not sampled in Cryptorhynchinae, Dryophthorinae, Entiminae, and Molytinae. *Nardonella* was entirely absent from Lixinae, Curculioninae and Cossoninae as sampled in this study. While its distribution across the weevil tree of life is scattered from Brentidae to various clades of Curculionidae, a dense concentration of *Nardonella* is seen in two clades, a Cryptorhynchinae clade and a core Baridinae-Molytinae clade. Across the phylogeny, the absence of *Nardonella* is sporadically distributed, rather than concentrated in a certain part of the tree. We consider this pattern, i.e., widespread presence of *Nardonella* and sporadic absence across the phylogeny, as evidence for recurrent losses of *Nardonella*-weevil association. An alternative explanation would be multiple independent acquisitions from other insects or the environment, but this is improbable as *Nardonella* is not known to occur in any insects or the environment. There would be no source for external acquisition. Also, the highly divergent 16s genes of *Nardonella* also lend support to the ancient origin, accompanied with recurrent losses explanation.

We reconstructed significant cophylogenetic (coevolutionary) structure formed between weevils and their *Nardonella* endosymbionts. ParaFit test results rejected the null hypothesis that weevil and *Nardonella* phylogenies are similar due to chance alone (ParaFitGlobal = 138275, P = 0.00001) and supported significant global cophylogenetic structure between the hosts and their endosymbionts. Specifically, out of the 44 s between hosts and bacteria, 22 contributed to this global fit (Fig. tangletree). Early diverging clades of weevils, i.e., Brentidae, Dryophthorinae, and Entiminae, and their *Nardonella* endosymbionts show perfect cophylogenetic relationship. For the remaining clades, cophylogeny was observed mainly at “shallow” to “medium” levels (Fig. 4).

#### *Promiscuity, co-existence and co-exclusion*

Fifty (45.9%) samples were infected with only one kind of endosymbiont, and 59 (54.1%) with 2 or more (38 with 2, 13 with 3, 7 with 4, and 1 with 6), thus considered as promiscuous samples. The majority or 75% (149/199) endosymbiont occurrences were associated with promiscuous samples. Endosymbionts belonging to Bacteroidetes exhibited co-existence 51 times, the highest among all, followed by Rickettsiales (48) and *Nardonella* (39) (Fig. Chord2). To adjust for differences in occurrence number between groups, the co-existence number was divided by the number of endosymbiont occurrences in a

group, giving us a "co-existence ratio". The lowest ratio (0.9 or 39/44) was found in Nardonella and Mollicutes (0.91), and the highest in Betaproteobacteria (2.2) and Bacteroidetes (1.8) (excluding Chromatiales for low occurrence number). This means that on average each symbiont occurrence in the first two groups co-existed not more than once with another symbiont, whereas in the last two groups, it was about twice or more.

Overall, negative correlation between major endosymbiont groups was dominant, with 21 of the 36 possible pairs showing weak to moderate negative correlation (Spearman's correlation coefficient between -0.1 to -0.5) (Fig. cormap). And those were concentrated in three groups, Nardonella, Rickettsiales and Mollicutes (Fig. cormap). Statistically significant, negative correlation was observed for the following pairs: Nardonella-Enterobacteriales (Spearman's correlation coefficient=-0.42, P=0.0016), Rickettsiales-Firmicutes (-0.45, 0.0008), Rickettsiales-P & O (-0.29, 0.034), and Rickettsiales-Enterobacteriales (-0.28, 0.039). Statistically significant, positive correlation was observed only for Chromatiales-Enterobacteriales (0.3, 0.028) and Chromatiales-P & O (0.33, 0.016) (only two samples were infected with Chromatiales).

We will take a focused look at how endosymbiont occurrences sorted in relation to the presence of Nardonella. The distributions of Rickettsiales between Nardonella-free and Nardonella-positive samples were not statistically significant (chi-square test,  $\chi^2 = 0.85447$ ,  $df = 1$ ,  $P = 0.36$ ). With Rickettsiales excluded, the distributions of the other 8 groups of endosymbionts were more strongly concentrated in Nardonella-free samples than in Nardonella-positive samples (chi-square test,  $df = 1$ ,  $\chi^2 = 41.061$ , p-value  $\leq 0.0001$ ). The negative correlation or co-exclusion between Nardonella and Enterobacteriales is specially evident (chi-square test,  $df = 1$ ,  $\chi^2 = 12.1$ ,  $P \leq 0.0005$ ) (Fig. 3). Among the 31 occurrences of Enterobacteriales (in 28 samples, as 3 samples each showed two occurrences), 28 were associated with Nardonella-free samples (n=69), and only 3 (9.7%) with Nardonella-positive samples (n=44) (Fig. Chord1). This means that samples hosting Nardonella were on average 6 times less likely to be infected with a bacterium in Enterobacteriales. This contrasts strongly with Rickettsiales—34.1% (14/41) of its occurrences co-existed with Nardonella-positive samples (Fig. 3).

## REFERENCES

- Mobolaji Adeolu, Seema Alnajar, Radhey S. Gupta, Sohail Naushad. Genome based phylogeny and taxonomy of the Enterobacteriales: proposal for Enterobacterales ord. nov. divided into the families Enterobacteriaceae Erwiniaceae fam. nov., Pectobacteriaceae fam. nov., Yersiniaceae fam. nov., Hafniaceae fam. nov., Morganellaceae fam. nov., and Budviciaceae fam. nov.. International Journal of Systematic and Evolutionary Microbiology Microbiology Society, 2016.
- J. Robert Bridges. Nitrogen-fixing bacteria associated with bark beetles. Microbial Ecology 7, 131–137 Springer Nature, 1981.
- Sandrine Brugiroux, Markus Beutler, Carina Pfann, Debora Garzetti, Hans-Joachim Ruscheweyh, Diana Ring, Manuel Diehl, Simone Herp, Yvonne Lötscher, Saib Hussain, Boyke Bunk, Rüdiger Pukall, Daniel H. Huson, Philipp C. Münch, Alice C. McHardy, Kathy D. McCoy, Andrew J. Macpherson, Alexander Loy, Thomas Clavel, David Berry, Bärbel Stecher. Genome-guided design of a defined mouse microbiota



that confers colonization resistance against *Salmonella enterica* serovar Typhimurium. *Nature Microbiology* 2, 16215 Springer Nature, 2016.

Paul Buchner. *Endosymbiosis of Animals with Plant Microorganisms*. John Wiley and Sons, 1965.

Khemraj Budachetri, Jaclyn Williams, Nabanita Mukherjee, Michael Sellers, Frank Moore, Shahid Karim. The microbiome of neotropical ticks parasitizing on passerine migratory birds. *Ticks and Tick-borne Diseases Elsevier BV*, 2016.

N. R. H. Burgess, S. N. McDermott, J. Whiting. Aerobic bacteria occurring in the hind-gut of the cockroach *Blatta orientalis*. *Journal of Hygiene* 71, 1–8 Cambridge University Press (CUP), 1973.

bibliography entry failed to display

C. Conord, L. Despres, A. Vallier, S. Balmand, C. Miquel, S. Zundel, G. Lemperiere, A. Heddi. Long-Term Evolutionary Stability of Bacterial Endosymbiosis in Curculionoidea: Additional Evidence of Symbiont Replacement in the Dryophthoridae Family. *Molecular Biology and Evolution* 25, 859–868 Oxford University Press (OUP), 2008.

C. Dale, I. Maudlin. *Sodalis* gen. nov. and *Sodalis glossinidius* sp. nov. a microaerophilic secondary endosymbiont of the tsetse fly *Glossina morsitans morsitans*. *International Journal of Systematic Bacteriology* 49, 267–275 Microbiology Society, 1999.

Olivier Duron, Ulrich E. Schneppat, Arnaud Berthomieu, Steven M. Goodman, Boris Droz, Christophe Paupy, Judicaël Obame Nkoghe, Nil Rahola, Pablo Tortosa. Origin acquisition and diversification of heritable bacterial endosymbionts in louse flies and bat flies. *Molecular Ecology* 23, 2105–2117 Wiley-Blackwell, 2014.

Robert C. Edgar. Search and clustering orders of magnitude faster than BLAST. *Bioinformatics* 26, 2460–2461 (2010).

Anne Le Flèche-Matéos, Meriadeg Ar Gouilh, Marion Levast, Ana Maria Burguière, Valérie Caro, Clément Andonian, Yolande Arnoux, Véronique Vincent, Mathias Vandenbogaert, Jean-Claude Manuguerra, Michel Perraud, Jean-Michel Thiberge, Laure Diancourt, Fabienne Lomprez. *Rouxiella chamberiensis* gen. nov. sp. nov., a member of the family Enterobacteriaceae isolated from parenteral nutrition bags. *International Journal of Systematic and Evolutionary Microbiology* 65, 1812–1818 Microbiology Society, 2015.

Corinna Gries, Edward Gilbert, Nico Franz. Symbiota — A virtual platform for creating voucher-based biodiversity information communities. *Biodiversity Data Journal* 2, e1114 (2014).

Jacqueline Hirsch, Stephan Strohmeier, Martin Pfannkuchen, Annette Reineke. Assessment of bacterial endosymbiont diversity in *Otiorhynchus* spp. (Coleoptera: Curculionidae) larvae using a multitag 454 pyrosequencing approach. *BMC Microbiology* 12, S6 Springer Nature, 2012.

Takahiro Hosokawa, Takema Fukatsu. *Nardonella* endosymbiont in the West Indian sweet potato weevil *Euscepes postfasciatus* (Coleoptera: Curculionidae). *Applied Entomology and Zoology* 45, 115–120 Japanese Society of Applied Entomology & Zoology, 2010.

Takahiro Hosokawa, Ryuichi Koga, Kohjiro Tanaka, Minoru Moriyama, Hisashi Anbutsu, Takema Fukatsu. *Nardonella* endosymbionts of Japanese pest and non-pest weevils (Coleoptera: Curculionidae). *Applied Entomology and Zoology* 50, 223–229 Springer Nature, 2015.

Xu Huang, Yunshan Huang, Jingyu Zhang, Fang Lu, Jing Wei, Mingxing Jiang. The Symbiotic Bacteria *Nardonella* in Rice Water Weevil (Coleoptera: Curculionidae): Diversity Density, and Associations With Host Reproduction. *Annals of the Entomological Society of America* 109, 415–423 Oxford University Press (OUP), 2016.

D. H. Huson, C. Scornavacca. *Dendroscope 3: An Interactive Tool for Rooted Phylogenetic Trees and Networks*. *Systematic Biology* 61, 1061–1067 Oxford University Press (OUP), 2012.

Frank E Harrell Jr. *Hmisc: Harrell Miscellaneous*. (2017).

Kazutaka Katoh, George Asimenos, Hiroyuki Toh. Multiple alignment of DNA sequences with MAFFT. 39–64 In *Methods in Molecular Biology*. Springer Science + Business Media, 2009.

K Katoh, DM Standley. MAFFT multiple sequence alignment software version 7: improvements in performance and usability. *Mol Biol Evol* 30, 772–80 (2013).

C. Lefevre. Endosymbiont Phylogeny in the Dryophthoridae Weevils: Evidence for Bacterial Replacement. *Molecular Biology and Evolution* 21, 965–973 Oxford University Press (OUP), 2004.

Pierre Legendre, Yves Desclères, Eric Bazin. A Statistical Test for Host-Parasite Coevolution. *Systematic Biology* 51, 217–234 Oxford University Press (OUP), 2002.

Ivica Letunic, Peer Bork. Interactive tree of life (iTOL) v3: an online tool for the display and annotation of phylogenetic and other trees. *Nucleic Acids Res* 44, W242–W245 Oxford University Press (OUP), 2016.

Kaili Li, Huiying Chen, Jinjin Jiang, Xiangyu Li, Jiannong Xu, Yajun Ma. Diversity of bacteriome associated with *Phlebotomus chinensis* (Diptera: Psychodidae) sand flies in two wild populations from China. *Scientific Reports* 6, 36406 Springer Nature, 2016.

Bo Liu, Jin Luo, Wei Li, Xiu-Feng Long, Yu-Qin Zhang, Zhi-Gang Zeng, Yong-Qiang Tian. *Erwinia teleogrylli* sp. nov. a Bacterial Isolate Associated with a Chinese Cricket. *PLOS ONE* 11, e0146596 Public Library of Science (PLoS), 2016.

J. P. Meier-Kolthoff, A. F. Auch, D. H. Huson, M. Goker. *COPYCAT : cophylogenetic analysis tool*. *Bioinformatics* 23, 898–900 Oxford University Press (OUP), 2007.

Adrien Merville, Samuel Venner, Hélène Henri, Agnès Vallier, Frédéric Menu, Fabrice Vavre, Abdelaziz Heddi, Marie-Claude Bel-Venner. Endosymbiont diversity among sibling weevil species competing for the same resource. *BMC Evolutionary Biology* 13, 28 Springer Nature, 2013.

Jesús Morales-Jiménez, Arturo Vera-Ponce de León, Aidé García-Domínguez, Esperanza Martínez-Romero, Gerardo Zúñiga, César Hernández-Rodríguez. Nitrogen-Fixing and Uricolytic Bacteria

Associated with the Gut of *Dendroctonus rhizophagus* and *Dendroctonus valens* (Curculionidae: Scolytinae). *Microbial Ecology* 66, 200–210 Springer Nature, 2013.

R. G. E. Murray, E. Stackebrandt. Taxonomic Note: Implementation of the Provisional Status Candidatus for Incompletely Described Prokaryotes. *International Journal of Systematic Bacteriology* 45, 186–187 Microbiology Society, 1995.

Rolf G Oberprieler, Adriana E Marvaldi, Robert S Anderson. Weevils, weevils, weevils everywhere. *Zootaxa* 1668, 491–520 (2007).

Claire E. Price, Araz Zeyniyev, Oscar P. Kuipers, Jan Kok. From meadows to milk to mucosa adaptation of *Streptococcus* and *Lactococcus* species to their nutritional environments. *FEMS Microbiology Reviews* 36, 949–971 Oxford University Press (OUP), 2012.

F. G. Priest, M. Barker. Gram-negative bacteria associated with brewery yeasts: reclassification of *Obesumbacterium proteus* biogroup 2 as *Shimwellia pseudoproteus* gen. nov. sp. nov., and transfer of *Escherichia blattae* to *Shimwellia blattae* comb. nov.. *INTERNATIONAL JOURNAL OF SYSTEMATIC AND EVOLUTIONARY MICROBIOLOGY* 60, 828–833 Microbiology Society, 2009.

Torbjørn Rognes, Tomáš Flouri, Ben Nichols, Christopher Quince, Frédéric Mahé. VSEARCH: a versatile open source tool for metagenomics. *PeerJ* 4, e2584 (2016).

M Fischer-Le Saux, E Arteaga-Hernández, Z Mrázek, N.E Boemare. The bacterial symbiont *Xenorhabdus poinarii* (Enterobacteriaceae) is harbored by two phylogenetic related host nematodes: the entomopathogenic species *Steinernema cubanum* and *Steinernema glaseri* (Nematoda: Steinernematidae). *FEMS Microbiology Ecology* 29, 149–157 Oxford University Press (OUP), 1999.

L. Sinclair, O. A. Osman, S. Bertilsson, A. Eiler. Microbial community composition and diversity via 16S rRNA gene amplicons: evaluating the Illumina platform. Cold Spring Harbor Laboratory Press, 2014.

A. Stamatakis. RAxML version 8: a tool for phylogenetic analysis and post-analysis of large phylogenies. *Bioinformatics* 30, 1312–1313 Oxford University Press (OUP), 2014.

M. L. Thao, N. A. Moran, P. Abbot, E. B. Brennan, D. H. Burckhardt, P. Baumann. Cospeciation of Psyllids and Their Primary Prokaryotic Endosymbionts. *Applied and Environmental Microbiology* 66, 2898–2905 American Society for Microbiology, 2000.

M. L. Thao, P. Baumann. Evolutionary Relationships of Primary Prokaryotic Endosymbionts of Whiteflies and Their Hosts. *Applied and Environmental Microbiology* 70, 3401–3406 American Society for Microbiology, 2004.

H. Toju, T. Hosokawa, R. Koga, N. Nikoh, X. Y. Meng, N. Kimura, T. Fukatsu. Candidatus *Curculioniphilus buchneri*, a Novel Clade of Bacterial Endocellular Symbionts from Weevils of the Genus *Curculio*. *Applied and Environmental Microbiology* 76, 275–282 American Society for Microbiology, 2009.

Hirokazu Toju, Akifumi S Tanabe, Yutaka Notsu, Teiji Sota, Takema Fukatsu. Diversification of endosymbiosis: replacements co-speciation and promiscuity of bacteriocyte symbionts in weevils. *The ISME Journal* 7, 1378–1390 Springer Nature, 2013.

H. Toju, T. Fukatsu. Diversity and infection prevalence of endosymbionts in natural populations of the chestnut weevil: relevance of local climate and host plants. *Molecular Ecology* 20, 853–868 Wiley-Blackwell, 2010.

David W. Waite, Melissa Dsouza, Kristi Biswas, Darren F. Ward, Peter Deines, Michael W. Taylor. Microbial community structure in the gut of the New Zealand insect Auckland tree weta (*Hemideina thoracica*). *Archives of Microbiology* 197, 603–612 Springer Nature, 2015.

Taiyun Wei, Viliam Simko. *corrplot: Visualization of a Correlation Matrix*. (2016).

Jennifer A. White, Nicola K. Richards, Aurelie Laugraud, Abiya Saeed, Meghan M. Curry, Mark R. McNeill. Endosymbiotic candidates for parasitoid defense in exotic and native New Zealand weevils. *Microbial Ecology* 70, 274–286 Springer Science + Business Media, 2015.

K. P. Williams, J. J. Gillespie, B. W. S. Sobral, E. K. Nordberg, E. E. Snyder, J. M. Shallom, A. W. Dickerman. Phylogeny of Gammaproteobacteria. *Journal of Bacteriology* 192, 2305–2314 American Society for Microbiology, 2010.

Jiajie Zhang, Kassian Kobert, Tomáš Flouri, Alexandros Stamatakis. PEAR: a fast and accurate Illumina Paired-End reAd mergeR. *Bioinformatics* 30, 614-620 (2014).

Table 1. Taxonomic assignments, abundance and BLAST matches of symbiont sequences of weevils (Curculionoidea) and other beetles. Higher-level classification primarily follows that of NCBI Taxonomy. Phylogenetic placement is a short statement that describes the phylogenetic relationship of undetermined sequences to reference bacteria on a given phylogeny (reconstructed using 16s sequences and maximum likelihood method in this study). An existing taxonomic name is used if it captures the phylogenetic relationship, but an informal name is created to accommodate a “novel” (previously unnamed or unknown) relationship. Nearly all “provisional names” carry a modifier “symbiont of weevil” because in the absence of a well-curated database of insect bacterial symbionts, this will facilitate data discovery and communication. Abundance refers to the read number of a sequence. Only determined sequences (to species or genus for certain symbionts) in Genbank are considered for best BLAST matches. Similarity is a percentage value. Mean values of abundance and similarity are provided only if the number of sequences is equal to four or greater.

In ‘provisional name’ column, add a note to indicate if the bacteria is previously known as an insect symbiont.

| Phylum        | Class       | Order         | Family               | Genus                                                                                         | Phylogenetic placement                                                                                                 | Provisional name <sup>1</sup>          | Abundance (mean)  | No. samples                                   | Best BLAST match(es)                | Similarity to best match (mean) |
|---------------|-------------|---------------|----------------------|-----------------------------------------------------------------------------------------------|------------------------------------------------------------------------------------------------------------------------|----------------------------------------|-------------------|-----------------------------------------------|-------------------------------------|---------------------------------|
| Bacteroidetes | Bacteroidia | Bacteroidales | Bacteroidaceae       | <i>Bacteroides</i>                                                                            | Part of <i>Bacteroides</i> clade (including sequences from cockroaches and termites)                                   | <i>Bacteroides</i> symbiont of weevil  | 104-2057 (510)    | 4                                             | <i>Bacteroides</i> spp.             | 92.2-95.2 (93.9)                |
|               |             |               | Porphyromonadaceae   | <i>Dysgonomonas</i>                                                                           | Part of a clade containing <i>Dysgonomonas</i> spp. and bacteria from termites, cockroaches, beetles and a millipede   | <i>Dysgonomonas</i> symbiont of weevil | 102-3289 (812)    | 3                                             | <i>Dysgonomonas</i> spp.            | 93.5-100 (97.7)                 |
|               |             |               | N/A                  |                                                                                               | Part of a clade containing <i>Proteiniphilum</i> , <i>Petrimonas</i> , <i>Fermentimonas</i> and <i>Lascolabacillus</i> | Porphyromonadaceae symbiont of weevil  | 722-44474 (10526) | 5                                             | <i>Lascolabacillus massiliensis</i> | 94.1-95.7 (95.0)                |
|               |             |               | <i>Porphyromonas</i> | Part of a clade containing <i>Porphyromonas</i> spp. and <i>Falsiporphyromonas endometrii</i> | <i>Porphyromonas</i> symbiont of weevil                                                                                | 447-3608                               | 2                 | <i>Parabacteroides</i> / <i>Porphyromonas</i> | 88.8-95.2                           |                                 |

|                                  |                                    |                       |                                                                                                                          |                                                                                                                |                  |    |                                                                                   |                  |
|----------------------------------|------------------------------------|-----------------------|--------------------------------------------------------------------------------------------------------------------------|----------------------------------------------------------------------------------------------------------------|------------------|----|-----------------------------------------------------------------------------------|------------------|
| Chitinophaga<br>Flavobacteriales | Prevotellaceae                     | N/A                   | Sister to Prevotellaceae                                                                                                 | Prevotellaceae symbiont of weevil                                                                              | 353-1706         | 2  | <i>Bacteroides</i> spp.                                                           | 83.2-84.1        |
|                                  | N/A                                | N/A                   | Sister to " <i>Candidatus Symbiothrix</i> ", " <i>Candidatus Armantifilum</i> " and " <i>Candidatus Azobacteroides</i> " | Bacteroidales symbiont of weevil close to <i>Symbiothrix</i> , <i>Armantifilum</i> , and <i>Azobacteroides</i> | 112-443          | 2  | <i>Parabacteroides distasonis</i> / " <i>Candidatus Symbiothrix dinenymphae</i> " | 84.4-89.6        |
|                                  | Chitinophagaceae                   | N/A                   | Sister to a clade containing <i>Flavisolibacter</i> , <i>Arachidicoccus</i> and <i>Haoranjiana</i>                       | Chitinophagaceae symbiont of weevil                                                                            | 158-4726 (1768)  | 5  | <i>Chitinophaga</i> spp. / <i>Parasegetibacter luojiensis</i>                     | 86.3-93.2 (90.8) |
|                                  | Flavobacteriaceae                  | <i>Apibacter</i>      | Part of a clade containing <i>Apibacter</i> and bacteria from <i>Cansilliella</i> (beetle), cockroaches and bees         | <i>Apibacter</i> symbiont of weevil                                                                            | 334-350          | 2  | <i>Apibacter adventoris</i>                                                       | 90.6-94.1        |
|                                  | Flavobacteriaceae                  | <i>Flavobacterium</i> | Part of a clade containing <i>Flavobacterium</i> spp. and undetermined bacteria from ants and cockroaches                | <i>Flavobacterium</i> symbiont of weevil                                                                       | 3305             | 1  | <i>Flavobacterium anatoliense</i>                                                 | 96.7             |
|                                  | Flavobacteriaceae                  | <i>Myroides</i>       | Sister to <i>Myroides</i> clade (including a bacterium from ants)                                                        | <i>Myroides</i> symbiont of weevil                                                                             | 4134-21286       | 2  | <i>Myroides pelagicus</i>                                                         | 90.1             |
|                                  | Flavobacteriaceae                  | <i>Weeksella</i>      | Part of a clade containing " <i>Weeksella</i> ", <i>Vaginella</i> and undetermined bacteria from flies and mosquitoes    | <i>Weeksella</i> symbiont of weevil                                                                            | 1198             | 1  | <i>Weeksella virosa</i>                                                           | 94.9             |
| Firmicutes<br>Bacilli            | Lactobacillales<br>Enterococcaceae | <i>Enterococcus</i>   | Part of <i>Enterococcus</i> clade                                                                                        | <i>Enterococcus</i> symbiont of weevil (tenebrionid)                                                           | 2349-8746 (4519) | 5* | <i>Enterococcus</i> spp.                                                          | 99.7-100 (99.9)  |

|                               |                     |                     |                      |                                                                                                                                                           |                                                                   |                                           |                   |                                       |                              |                 |
|-------------------------------|---------------------|---------------------|----------------------|-----------------------------------------------------------------------------------------------------------------------------------------------------------|-------------------------------------------------------------------|-------------------------------------------|-------------------|---------------------------------------|------------------------------|-----------------|
| Erysipelotrichia <sup>§</sup> | Erysipelotrichales  | Lactobacillaceae    | <i>Lactobacillus</i> | Part of <i>Lactobacillus</i> clade                                                                                                                        | <i>Lactobacillus</i> symbiont of cerambycid ( <i>Amblyderus</i> ) | 9446-24198                                | 2 <sup>#</sup>    | <i>Lactobacillus</i> spp.             | 99.7-100                     |                 |
|                               |                     | Leuconostocaceae    | <i>Weissella</i>     | Part of a clade containing <i>Weissella</i> , <i>Leuconostoc</i> and <i>Fructobacillus</i>                                                                | <i>Weissella</i> symbiont of weevil                               | 1108-62691 (18426)                        | 3                 | <i>Weissella koreensis</i>            | 99.2                         |                 |
|                               |                     | Streptococcaceae    | <i>Lactococcus</i>   | Part of <i>Lactococcus</i> clade                                                                                                                          | <i>Lactococcus</i> symbiont of weevil (melyrid, tenebrionid)      | 2934-43670 (17098)                        | 5*                | <i>Lactococcus</i> spp.               | 100 (100)                    |                 |
|                               |                     | Erysipelotrichaceae | <i>Breznakia</i>     | Part of a clade containing <i>Breznakia</i> spp. and undetermined bacteria from termites and cockroaches                                                  | <i>Breznakia</i> symbiont of weevil                               | 2984                                      | 1                 | <i>Breznakia pachnodae</i>            | 98.4                         |                 |
|                               |                     | Erysipelotrichaceae | N/A                  | Sister to a clade containing undetermined Erysipelotrichaceae bacteria from Lepidoptera, human and soil                                                   | Erysipelotrichaceae symbiont of weevil clade one                  | 329                                       | 1                 | <i>Clostridium saccharogumia</i>      | 95.7                         |                 |
|                               |                     | Erysipelotrichaceae | N/A                  | Part of a clade containing undetermined bacteria from a beetle, two cockroaches and a mammal; closest determined bacterium is <i>Beduini massiliensis</i> | Erysipelotrichaceae symbiont of weevil clade two                  | 161                                       | 1                 | <i>Erysipelatoclostridium ramosum</i> | 90.9                         |                 |
| Proteobacteria                | Alphaproteobacteria | Rickettsiales       | Anaplasmataceae      | <i>Wolbachia</i>                                                                                                                                          | Part of <i>Wolbachia</i> clade                                    | <i>Wolbachia</i> symbiont of weevil       | 157-66409 (7582)  | 28                                    | <i>Wolbachia</i>             | 98.4-100 (99.8) |
|                               |                     |                     |                      | N/A                                                                                                                                                       | Sister to <i>Wolbachia</i> clade                                  | <i>Wolbachia</i> -like symbiont of weevil | 154               | 1                                     | <i>Ehrlichia chaffeensis</i> | 88              |
|                               |                     |                     | Rickettsiaceae       | <i>Rickettsia</i>                                                                                                                                         | Part of <i>Rickettsia</i> clade                                   | <i>Rickettsia</i> symbiont of weevil      | 294-54894 (10743) | 12                                    | <i>Rickettsia</i> spp.       | 98.7-100 (99.2) |

|                     |                    |                                         |                                                                      |                                                                                                                      |                                                               |                                                               |                           |                                 |                                                |
|---------------------|--------------------|-----------------------------------------|----------------------------------------------------------------------|----------------------------------------------------------------------------------------------------------------------|---------------------------------------------------------------|---------------------------------------------------------------|---------------------------|---------------------------------|------------------------------------------------|
| Betaproteobacteria  | Burkholderiales    | Burkholderiaceae                        | <i>Burkholderia</i>                                                  | Part of a clade containing <i>Burkholderia</i> symbionts of various heteropteran insects                             | <i>Burkholderia</i> symbiont of weevil                        | 1710                                                          | 1                         | <i>Burkholderia turbans</i>     | 100                                            |
|                     |                    | Comamonadaceae                          | <i>Symbiobacter</i>                                                  | Sister to " <i>Candidatus</i> Symbiobacter mobilis                                                                   | <i>Symbiobacter</i> symbiont of weevil                        | 1140-16158                                                    | 2                         | <i>Rhodoferax antarcticus</i>   | 91.7-94.9                                      |
|                     | Neisseriales       | Neisseriaceae                           | N/A                                                                  | Part of a clade containing <i>Snodgrassella</i> , <i>Populibacter</i> , <i>Stenoxybacter</i> and <i>Vitreoscilla</i> | Weevil symbiont close to <i>Snodgrassella</i>                 | 143-259                                                       | 2                         | <i>Snodgrassella alvi</i>       | 93.6-94.9                                      |
| Gammaproteobacteria | Chromatiales       | Chromatiaceae                           | <i>Thiorhodococcus</i>                                               | Part of a clade containing <i>Thiorhodococcus</i> spp.                                                               | <i>Thiorhodococcus</i> symbiont of weevil (cerambycid)        | 2730-7719                                                     | 2*                        | <i>Thiorhodococcus</i> spp.     | 90.2-91.8                                      |
|                     |                    | Enterobacteriales                       | Enterobacteriaceae                                                   | Curculioniphilus                                                                                                     | Part of " <i>Candidatus</i> Curculioniphilus" clade           | " <i>Candidatus</i> Curculioniphilus sp."                     | 9136                      | 1                               | " <i>Candidatus</i> Curculioniphilus buchneri" |
|                     |                    |                                         | <i>Citrobacter</i>                                                   | Part of a clade containing <i>Citrobacter</i> spp.                                                                   | <i>Citrobacter</i> symbiont of chrysomelid                    | 9004                                                          | 1 <sup>#</sup>            | <i>Citrobacter amalonaticus</i> | 100                                            |
|                     |                    |                                         | <i>Enterobacter</i>                                                  | Identical to several species of <i>Enterobacter</i>                                                                  | <i>Enterobacter</i> symbiont of weevil ( <i>Stenomorpha</i> ) | 11236-12120                                                   | 2*                        | <i>Enterobacter</i> spp.        | 100                                            |
|                     |                    | <i>Gibbsiella</i>                       | Part of <i>Gibbsiella</i> clade                                      | <i>Gibbsiella</i> symbiont of weevil                                                                                 | 659-33875                                                     | 3                                                             | <i>Gibbsiella greigii</i> | 95.2-97.3                       |                                                |
|                     | <i>Kleidoceria</i> | Sister to <i>Kleidoceria schneideri</i> | <i>Kleidoceria</i> symbiont of <i>Acromis sparsa</i> [Chrysomelidae] | 1422                                                                                                                 | 1 <sup>#</sup>                                                | <i>Blochmannia</i> endosymbiont of <i>Camponotus nitidior</i> | 92                        |                                 |                                                |



|                   |                     |                                                                                                                                              |                                                          |                   |    |                                                                       |                  |
|-------------------|---------------------|----------------------------------------------------------------------------------------------------------------------------------------------|----------------------------------------------------------|-------------------|----|-----------------------------------------------------------------------|------------------|
|                   | <i>Kluyvera</i>     | Part of <i>Kluyvera</i> clade                                                                                                                | <i>Kluyvera</i> symbiont of weevil                       | 26694             | 1  | <i>Kluyvera georgiana</i>                                             | 99.2             |
|                   | <i>Raoultella</i>   | Identical to <i>Raoultella terrigena</i> and part of a clade containing <i>Raoultella</i> spp.                                               | <i>Raoultella terrigena</i>                              | 12785             | 1  | <i>Raoultella terrigena</i>                                           | 100              |
|                   | <i>Shimwellia</i>   | Part of a clade containing <i>Shimwellia blattae</i> and <i>Erwinia teleogrylli</i>                                                          | <i>Shimwellia</i> symbiont of weevil                     | 2742              | 1  | <i>Cronobacter sakazakii</i>                                          | 97.3             |
|                   | <i>Trabulsiella</i> | Part of a clade containing <i>Trabulsiella</i> and undetermined bacteria from <i>Rhynchophorus</i> (weevil)                                  | <i>Trabulsiella</i> symbiont of weevil (melyrid)         | 9281-13250        | 2* | <i>Klebsiella michiganensis</i> / <i>Enterobacter massiliensis</i>    | 93.4-96.5        |
|                   | N/A                 | Part of a clade sister to " <i>Candidatus</i> Nardonella", which also includes Y-symbiont from <i>Anomoneura mori</i> (Hemiptera: Psyllidae) | Weevil symbiont close to " <i>Candidatus</i> Nardonella" | 101-455           | 2  | <i>Nissabacter archeti</i> / <i>Candidatus</i> Blochmannia festinatus | 91.8-92.6        |
| Erwiniaceae       | <i>Erwinia</i>      | Part of a clade containing <i>Erwinia</i> spp.                                                                                               | <i>Erwinia</i> symbiont of weevil (cerambycid)           | 133-2748 (1191)   | 6* | <i>Erwinia</i> / <i>Pantoea</i> / <i>Raoultella</i>                   | 98.7-100 (99.4)  |
|                   | <i>Pantoea</i>      | Part of a clade containing <i>Pantoea wallisii</i> , <i>P. dispersa</i> and symbionts of pentatomids                                         | <i>Pantoea</i> symbiont of weevil                        | 188-476           | 2  | <i>Erwinia billingiae</i> / <i>Pantoea</i> spp.                       | 99.2-100         |
| Morganellaceae    | <i>Arsenophonus</i> | Sister to <i>Arsenophonus nasoniae</i>                                                                                                       | <i>Arsenophonus nasoniae</i>                             | 3546              | 1  | <i>Arsenophonus nasoniae</i>                                          | 99               |
| N/A               | <i>Nardonella</i>   | Part of <i>Nardonella</i> clade                                                                                                              | " <i>Candidatus</i> Nardonella sp."                      | 158-97132 (24616) | 44 | Predominantly <i>Nardonella</i>                                       | 80.9-96.1 (92.3) |
| Pectobacteriaceae | <i>Sodalis</i>      | Part of <i>Sodalis</i> complex                                                                                                               | <i>Sodalis</i> symbiont of weevil                        | 155-25992 (6654)  | 7  | <i>Sodalis</i> symbionts                                              | 97.1-100         |

|                |                 |                    |                                                                                                                                    |                                                           |                                       |                    |                                                                                                |                             |                  |
|----------------|-----------------|--------------------|------------------------------------------------------------------------------------------------------------------------------------|-----------------------------------------------------------|---------------------------------------|--------------------|------------------------------------------------------------------------------------------------|-----------------------------|------------------|
| Orbales        | Orbaceae        | <i>Frischella</i>  | Sister to <i>Frischella perrara</i>                                                                                                | <i>Frischella</i> symbiont of weevil                      | 774                                   | 1                  | <i>Gilliamella apicola</i> / <i>Frischella perrara</i>                                         | 96                          |                  |
|                |                 | N/A                | Sister to Orbales                                                                                                                  | Orbales symbiont of weevil                                | 868-1545                              | 3                  | " <i>Candidatus</i> Purcelliella pentastirinorum" / <i>Shigella dysenteriae</i>                | 85.0-86.0                   |                  |
| Pasteurellales | Pasteurellaceae | N/A                | Part of a clade sister to Pasteurellales                                                                                           | Pasteurellaceae symbiont of weevil (cerambycid) clade one | 120-6954 (1838)                       | 5                  | <i>Chelonobacter oris</i>                                                                      | 93.0-94.0 (93.8)            |                  |
|                |                 | N/A                | Part of a clade containing <i>Testudinibacter</i> , <i>Pasteurella</i> , and <i>Chelonobacter</i>                                  | Pasteurellaceae symbiont of weevil clade two              | 137-2303                              | 3                  | <i>Actinobacillus capsulatus</i> / <i>Pasteurella testudinis</i> / <i>Haemophilus parasuis</i> | 92.0-94.0                   |                  |
| N/A            | N/A             | N/A                | Part of a clade sister to Orbales and Pasteurellales                                                                               | Weevil symbiont close to Orbales and Pasteurellales       | 453-3383 (2293)                       | 5                  | <i>Lonsdalea quercina</i>                                                                      | 89.0-89.4 (89.3)            |                  |
| Vibrionales    | Vibrionaceae    | N/A                | Sister to "primary endosymbiont of <i>Liposcelis decolor</i> (Psocoptera)" and closest determined bacterium is <i>Salinivibrio</i> | Vibrionaceae symbiont of weevil                           | 1642                                  | 1                  | <i>Aliivibrio fischeri</i>                                                                     | 82.8                        |                  |
| Tenericutes    | Mollicutes      | Entomoplasmataceae | <i>Mesoplasma</i>                                                                                                                  | Part of a clade containing <i>Mesoplasma</i> spp.         | <i>Mesoplasma</i> symbiont of weevil  | 5107               | 1                                                                                              | <i>Mesoplasma corruscae</i> | 96.8             |
|                |                 |                    | <i>Spiroplasma</i>                                                                                                                 | Most closely related to various <i>Spiroplasma</i> spp.   | <i>Spiroplasma</i> symbiont of weevil | 171-151706 (24731) | 9                                                                                              | <i>Spiroplasma</i> spp.     | 97.0-99.7 (98.6) |

Mycoplasmatales

|                 |                  |                   |                                   |                                      |       |   |                            |      |
|-----------------|------------------|-------------------|-----------------------------------|--------------------------------------|-------|---|----------------------------|------|
| Mycoplasmatales | Mycoplasmataceae | <i>Mycoplasma</i> | Sister to <i>Mycoplasma</i> clade | <i>Mycoplasma</i> symbiont of weevil | 28210 | 1 | <i>Mycoplasma cottewii</i> | 95.4 |
|-----------------|------------------|-------------------|-----------------------------------|--------------------------------------|-------|---|----------------------------|------|

---

<sup>1</sup>The name in parentheses is used for symbiont sequences associated with non-weevil specimens.

\* These specimens include non-weevil beetle(s).

# These are not weevils.

**Figure 1.** 16s sequence data profile. (a) Total read numbers (upper) and proportions of endosymbiont and non-symbiont reads (lower) across 124 samples. Each bar represents a sample. The read numbers are based on the dereplicated, chimera-filtered data set. Bars in upper and lower charts do not match. (b) Numbers of sequences, occurrences, associated samples, and kinds in 10 major groups of endosymbionts. (c) Boxplot of abundance values of 10 major groups of endosymbiont sequences. The upper and lower borders of a box correspond to the first and third quartiles, and each box includes the middle 50% values in a group, or the interquartile range (IQR). The horizontal line inside a box is drawn at median, and its value indicated above the line. The upper or lower fence (not drawn) is a value that is 1.5xIQR above or below the third or first quartile. The horizontal lines at the ends of whiskers (i.e., vertical dotted lines) represent the maximum or minimum observation among all values in a group (when outliers are absent) or the observation that is closest to the upper or lower fence. Unfilled circles are outliers, which are values greater or smaller than the upper or lower fence. (d) Boxplot of similarities of endosymbiont sequences to best BLAST matches.

**Figure 2.** Endosymbiont diversity and sequence abundance are mapped onto a time-calibrated weevil phylogeny. The length of a bar is proportional to the total abundance an endosymbiont group (which would include one or several symbionts). Within a group, specific kinds of endosymbionts are denoted by different shapes. Taxa in double quotes are not monophyletic in the current study. ^Clade contains taxa previously not classified to the labeled taxon.

**Figure 3.** Correlation and coexistence among 10 major groups of endosymbionts.

**Figure 4.** Cophylogeny between weevils and their *Nardonella* endosymbionts.

Figure 1

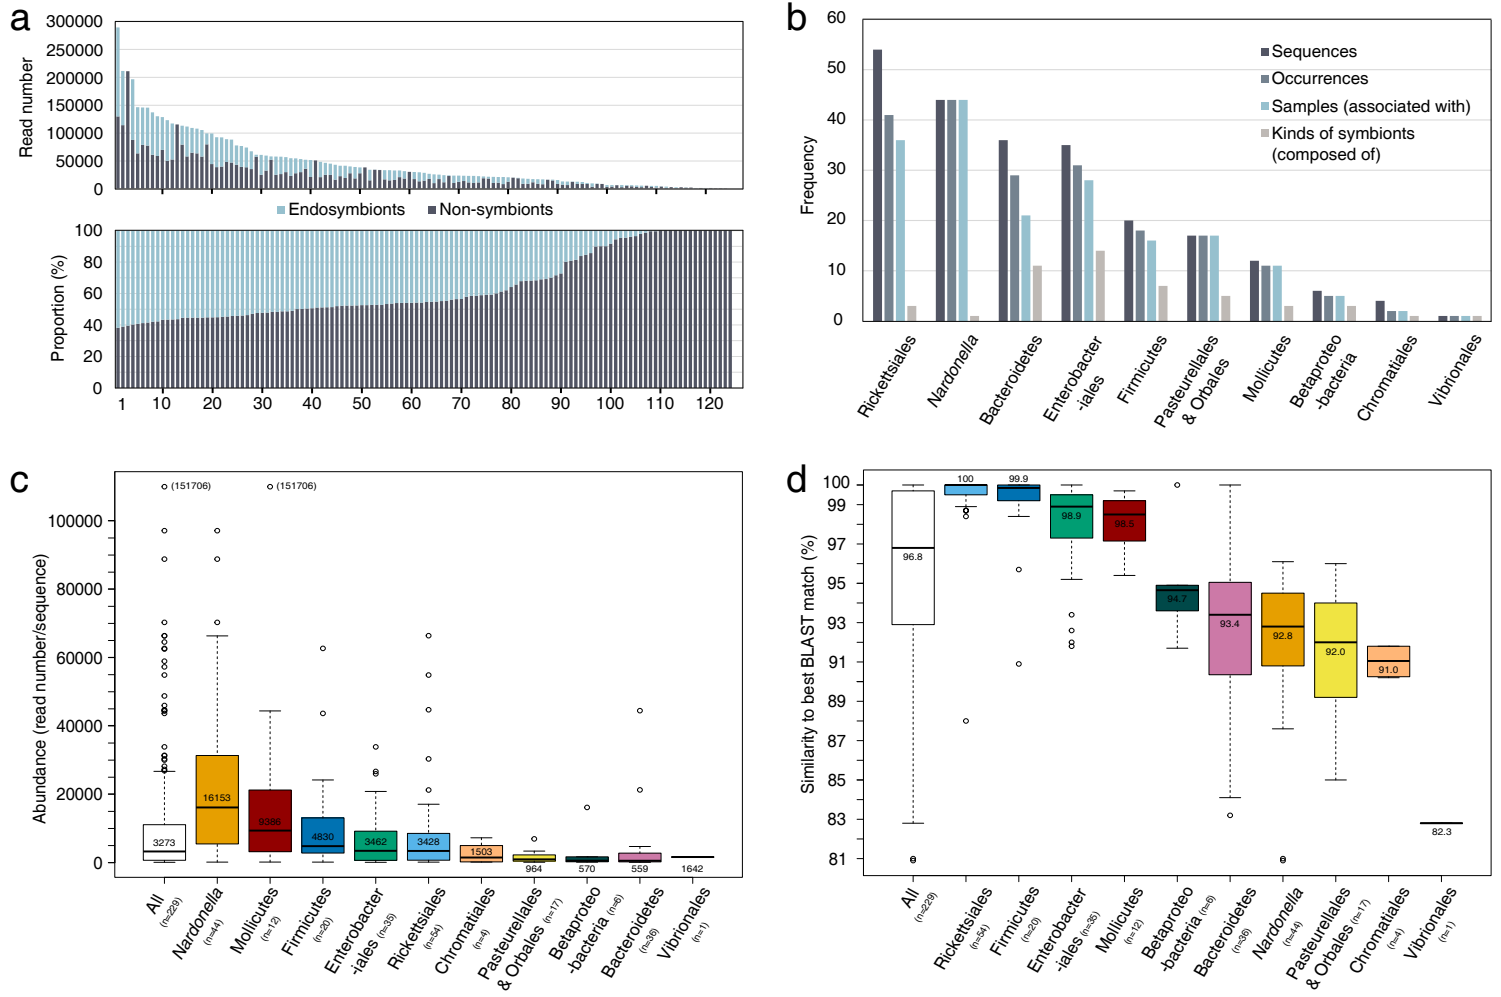

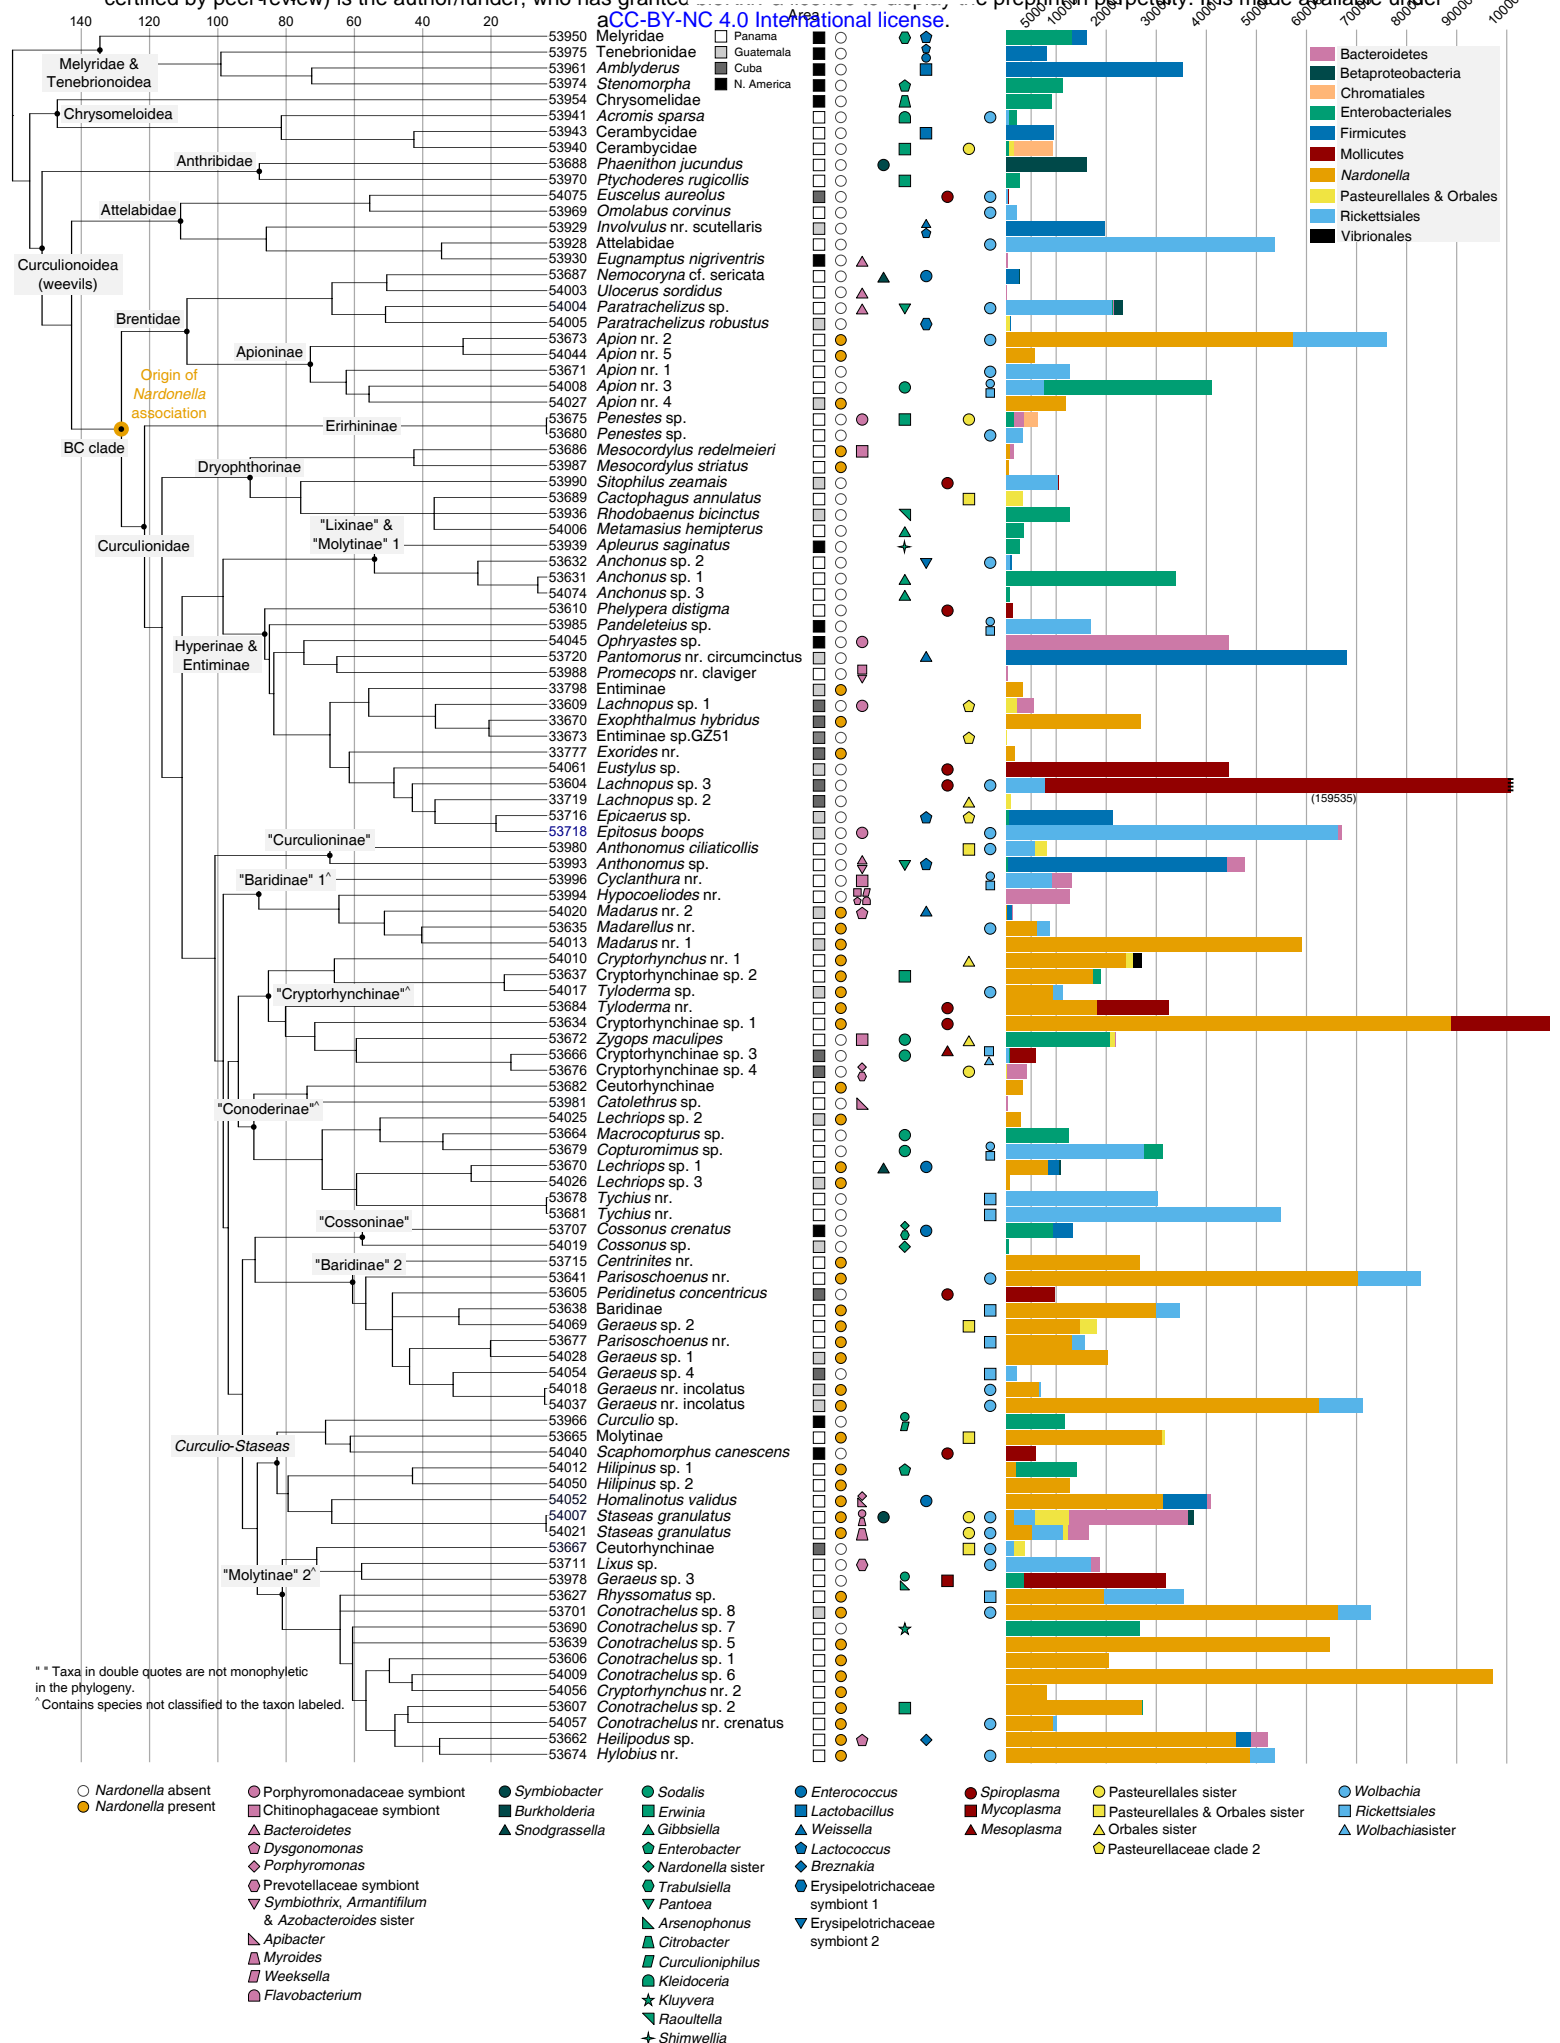

Figure 3

bioRxiv preprint doi: <https://doi.org/10.1101/171181>; this version posted August 1, 2017. The copyright holder for this preprint (which was not certified by peer review) is the author/funder, who has granted bioRxiv a license to display the preprint in perpetuity. It is made available under aCC-BY-NC 4.0 International license.

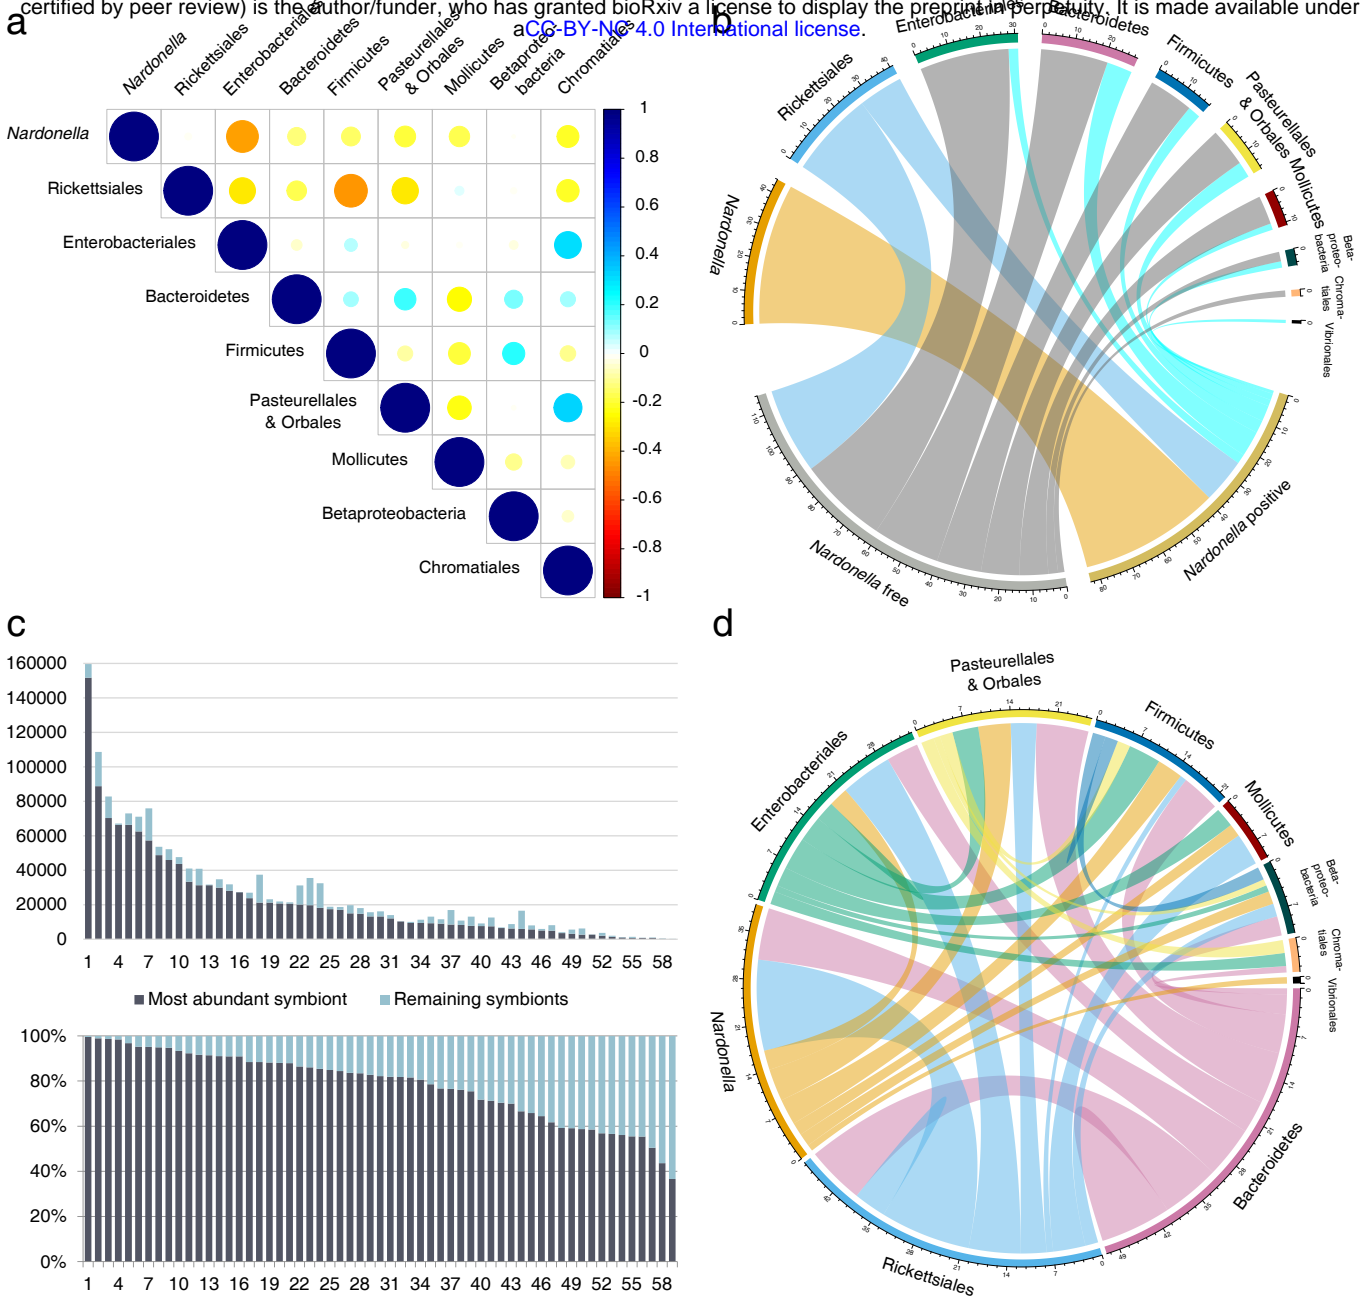

Figure 4

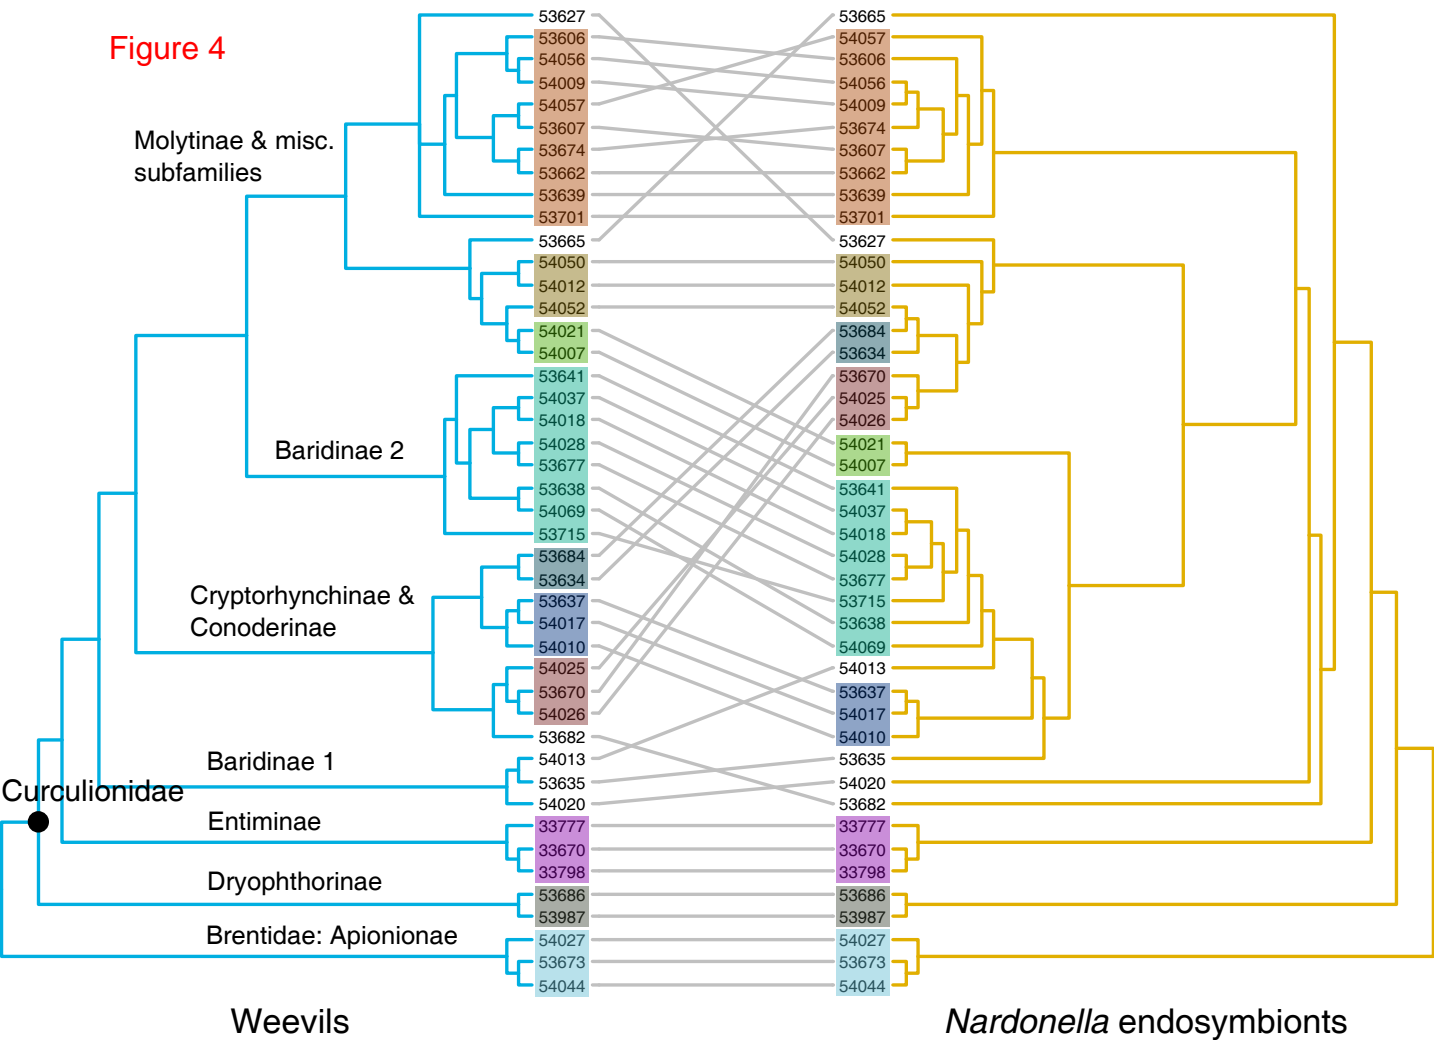

Source: https://www.biorxiv.org/content/10.1101/171181v1.full.pdf
